# Supplementary material for: Multi-Omics Analysis for Transcriptional Regulation of Immune-Related Targets Using Epigenetic Data: A New Research Direction
Source: Front Immunol. 2022 Jan 3;12:741634. doi: 10.3389/fimmu.2021.741634 (PMC8761734; doi:10.3389/fimmu.2021.741634)
Supplement: Supplementary file 3 [file Table_3.xlsx]

## Sheet: Sheet1
Supplemental Table S3
A list of GPCRs downloaded from the GPCR NaVa database.
OXGR1
HTR1A
HTR1B
HTR1D
HTR1E
HTR1F
HTR2A
HTR2B
HTR2C
HTR4
HTR5A
HTR6
HTR7
ADORA3
ADORA1
ADORA2A
ADORA2B
MC2R
ADRA1A
ADRA1B
ADRA1D
ADRA2A
ADRA2B
ADRA2C
APLNR
BDKRB1
BDKRB2
ADRB1
ADRB2
ADRB3
OPN1SW
BRS3
BAI1
BAI2
BAI3
C3AR1
C5AR1
GPR77
CELSR1
CELSR2
CELSR3
CALCRL
CALCR
CNR1
CNR2
CCRL2
CCR1
CCR10
CCRL1
CCR2
CCR3
CCR4
CCR5
CCR6
CCR7
CCR8
CCR9
CD97
CCBP2
CMKLR1
XCR1
CCKAR
CRHR1
CRHR2
CX3CR1
CXCR3
CXCR4
CXCR5
CXCR6
CXCR7
CYSLTR1
CYSLTR2
DRD1
DRD5
DRD2
DRD3
DRD4
OPRD1
DARC
ELTD1
EMR1
EMR2
EMR3
EDNRA
EDNRB
GPR37L1
CASR
FPR1
FSHR
FFAR1
FFAR2
FFAR3
FZD1
FZD10
FZD2
FZD3
FZD4
FZD5
FZD6
FZD7
FZD8
FZD9
GALR1
GALR2
GALR3
GABBR1
GABBR2
GIPR
CCKBR
GRPR
GLP1R
GLP2R
GCGR
GPR119
GNRHR
GPBAR1
GPER
NIACR2
GPR12
GPR120
GPR143
GPR15
GPR161
GPR182
GPR183
GPR3
GPR35
GPR39
GPR4
GPR56
GPR6
GPR64
GPR81
GPR84
GPR87
GPR98
GPRC5B
GPRC5C
GPRC5D
GPRC6A
OPN1MW
GHRHR
GHSR
IL8RA
IL8RB
HRH1
HRH2
HRH3
HRH4
OPRK1
KISS1R
LPHN1
LPHN2
LPHN3
LGR4
LGR5
LGR6
LTB4R
LTB4R2
LHCGR
LPAR1
LPAR2
LPAR3
LPAR4
LPAR5
MAS1
MRGPRD
MRGPRE
MRGPRF
MRGPRG
MRGPRX1
MRGPRX2
MRGPRX3
MRGPRX4
MAS1L
MCHR1
MCHR2
MC3R
MC4R
MC5R
MC1R
OPN4
MTNR1A
MTNR1B
GPR50
GRM1
GRM2
GRM3
GRM4
GRM5
GRM6
GRM7
GRM8
MLNR
CHRM1
CHRM2
CHRM3
CHRM4
CHRM5
OPRM1
GPR18
NMBR
TACR3
NMUR1
NMUR2
NPFFR1
NPFFR2
NPBWR1
NPBWR2
NPSR1
NPY1R
NPY2R
PPYR1
NPY5R
NTSR1
NTSR2
FPR2
FPR3
NIACR1
OPRL1
P2RY5
OR10A2
OR10A3
OR10A4
OR10A5
OR10A6
OR10A7
OR10AD1
OR10AG1
OR10C1
OR10G2
OR10G3
OR10G4
OR10G6
OR10G7
OR10G8
OR10G9
OR10H1
OR10H2
OR10H3
OR10H4
OR10H5
OR10J1
OR10J3
OR10J4
OR10J5
OR10K1
OR10K2
OR10P1
OR10Q1
OR10R2
OR10S1
OR10T2
OR10V1
OR10W1
OR10X1
OR10Z1
OR11A1
OR11G2
OR11H1
OR11H12
OR11H2
OR11H4
OR11H6
OR11H7
OR11L1
OR12D2
OR12D3
OR13A1
OR13C2
OR13C3
OR13C4
OR13C5
OR13C8
OR13C9
OR13D1
OR13F1
OR13G1
OR13H1
OR13J1
OR14A16
OR14A2
OR14C36
OR14I1
OR14J1
OR14K1
OR1A1
OR1A2
OR1B1
OR1C1
OR1D2
OR1D4
OR1D5
OR1E1
OR1E2
OR1E3
OR1F1
OR1F12
OR1F2
OR1G1
OR1I1
OR1J1
OR1J2
OR1J4
OR1K1
OR1L1
OR1L3
OR1L4
OR1L6
OR1L8
OR1M1
OR1N1
OR1N2
OR1P1
OR1Q1
OR1S1
OR1S2
OR2A12
OR2A1
OR2A14
OR2A2
OR2A25
OR2A4
OR2A5
OR2A7
OR2AE1
OR2AG1
OR2AG2
OR2AJ1
OR2AK2
OR2AP1
OR2AT4
OR2B11
OR2B2
OR2B6
OR2C1
OR2C3
OR2D2
OR2D3
OR2F1
OR2F2
OR2G2
OR2G3
OR2G6
OR2H1
OR2H2
OR2J1
OR2J2
OR2J3
OR2K2
OR2L13
OR2L2
OR2L3
OR2L5
OR2L8
OR2M2
OR2M3
OR2M4
OR2M5
OR2M7
OR2S2
OR2T1
OR2T10
OR2T11
OR2T12
OR2T2
OR2T27
OR2T29
OR2T3
OR2T33
OR2T34
OR2T35
OR2T4
OR2T5
OR2T6
OR2T7
OR2T8
OR2V1
OR2V2
OR2W1
OR2W3
OR2Y1
OR2Z1
OR3A1
OR3A2
OR3A3
OR3A4
OR4A15
OR4A16
OR4A47
OR4A5
OR4A8P
OR4B1
OR4C11
OR4C12
OR4C13
OR4C15
OR4C16
OR4C3
OR4C45
OR4C46
OR4C5
OR4C6
OR4D1
OR4D10
OR4D11
OR4D2
OR4D5
OR4D6
OR4D9
OR4E1
OR4E2
OR4F15
OR4F17
OR4F21
OR4F3
OR4F4
OR4F5
OR4F6
OR4K1
OR4K13
OR4K14
OR4K15
OR4K17
OR4K2
OR4K3
OR4K5
OR4L1
OR4M1
OR4M2
OR4N2
OR4N4
OR4N5
OR4P4
OR4Q2
OR4Q3
OR4S1
OR4S2
OR4X1
OR4X2
OR51A2
OR51A4
OR51A7
OR51B2
OR51B4
OR51B5
OR51B6
OR51D1
OR51E1
OR51E2
OR51F1
OR51F2
OR51G1
OR51G2
OR51I1
OR51I2
OR51J1
OR51L1
OR51M1
OR51Q1
OR51S1
OR51T1
OR51V1
OR52A1
OR52A5
OR52B2
OR52B4
OR52B6
OR52D1
OR52E1
OR52E2
OR52E4
OR52E5
OR52E6
OR52E8
OR52H1
OR52I1
OR52I2
OR52J3
OR52K1
OR52K2
OR52L1
OR52M1
OR52N1
OR52N2
OR52N4
OR52N5
OR52R1
OR52W1
OR52Z1
OR56A1
OR56A3
OR56A4
OR56A5
OR56B1
OR56B4
OR5A1
OR5A2
OR5AC1
OR5AC2
OR5AK2
OR5AL1
OR5AN1
OR5AP2
OR5AR1
OR5AS1
OR5AU1
OR5B12
OR5B17
OR5B2
OR5B21
OR5B3
OR5C1
OR5D13
OR5D14
OR5D16
OR5D18
OR5F1
OR5G3
OR5H1
OR5H14
OR5H15
OR5H2
OR5H6
OR5I1
OR5J2
OR5K1
OR5K2
OR5K3
OR5K4
OR5L1
OR5L2
OR5M1
OR5M10
OR5M11
OR5M3
OR5M8
OR5M9
OR5P2
OR5P3
OR5R1
OR5T1
OR5T2
OR5T3
OR5V1
OR5W2
OR6A2
OR6B1
OR6B2
OR6B3
OR6C1
OR6C2
OR6C3
OR6C4
OR6C6
OR6C65
OR6C68
OR6C70
OR6C74
OR6C75
OR6C76
OR6F1
OR6J1
OR6K2
OR6K3
OR6K6
OR6M1
OR6N1
OR6N2
OR6P1
OR6Q1
OR6S1
OR6T1
OR6V1
OR6X1
OR6Y1
OR7A10
OR7A17
OR7A5
OR7C1
OR7C2
OR7D2
OR7D4
OR7E24
OR7G1
OR7G2
OR7G3
OR8A1
OR8B12
OR8B2
OR8B3
OR8B4
OR8B8
OR8D1
OR8D2
OR8D4
OR8G1
OR8G2
OR8G5
OR8H1
OR8H2
OR8H3
OR8I2
OR8J1
OR8J2
OR8J3
OR8K1
OR8K3
OR8K5
OR8S1
OR8U1
OR8U8
OR8U9
OR9A2
OR9A4
OR9G1
OR9G4
OR9G9
OR9I1
OR9K2
OR9Q1
OR9Q2
OPN3
OPN5
HCRTR1
HCRTR2
GPR68
OXER1
OXTR
OR10D3P
P2RY1
P2RY11
P2RY12
P2RY13
P2RY14
P2RY2
P2RY4
P2RY6
P2RY8
PTH2R
PTH1R
ADCYAP1R1
PTAFR
GPR1
GPR101
GPR110
GPR111
GPR112
GPR113
GPR114
GPR115
GPR116
GPR123
GPR124
GPR125
GPR126
GPR128
GPR132
GPR133
GPR135
GPR139
GPR141
GPR142
GPR144
GPR146
GPR148
GPR149
GPR150
GPR151
GPR152
GPR153
GPR156
GPR157
GPR158
GPR160
GPR162
GPR171
GPR173
GPR174
GPR176
GPR179
GPR19
GPR20
GPR21
GPR22
GPR25
GPR26
GPR27
GPR31
GPR32
GPR33
GPR34
GPR37
GPR45
GPR52
GPR55
GPR61
GPR62
GPR63
GPR75
GPR78
GPR82
GPR83
GPR85
GPR88
GPR97
PROKR1
PROKR2
PRLHR
PTGIR
PTGDR
PTGER1
PTGER2
PTGER3
PTGER4
PTGFR
F2R
F2RL1
F2RL2
F2RL3
GPR65
VN2R1P
EMR4P
GNRHR2
GPR42P
GPR44
NPY6R
OR10D4P
OR10J6P
OR14L1P
OR2B3
OR2B8P
OR2I1P
OR2W5
OR2W6P
OR4A4P
OR51H1P
OR52A4
OR52L2P
OR52P1P
OR56B2P
OR5AK3P
OR7A2P
OR9A1P
P2RY10
TAS2R12
TAAR3
VNRL4
QRFPR
OPN1LW
RXFP3
RXFP4
RXFP1
RXFP2
GPRC5A
RHO
RGR
SCTR
SMO
SSTR1
SSTR2
SSTR3
SSTR4
SSTR5
S1PR1
S1PR2
S1PR3
S1PR4
S1PR5
TACR2
TACR1
SUCNR1
TAS1R1
TAS1R2
TAS1R3
TAS2R1
TAS2R10
TAS2R13
TAS2R14
TAS2R16
TAS2R3
TAS2R31
TAS2R38
TAS2R39
TAS2R4
TAS2R40
TAS2R41
TAS2R42
TAS2R43
TAS2R45
TAS2R46
TAS2R47
TAS2R48
TAS2R49
TAS2R5
TAS2R50
TAS2R60
TAS2R7
TAS2R8
TAS2R9
TBXA2R
TSHR
TRHR
TAAR1
TAAR2
TAAR5
TAAR6
TAAR8
TAAR9
AGTR1
AGTR2
GPR17
UTS2R
VIPR1
VIPR2
AVPR1A
AVPR1B
AVPR2
RRH
VN1R1
VN1R2
VN1R3
VN1R4
VN1R5
