# Supplementary material for: Multi-Omics Analysis for Transcriptional Regulation of Immune-Related Targets Using Epigenetic Data: A New Research Direction
Source: Front Immunol. 2022 Jan 3;12:741634. doi: 10.3389/fimmu.2021.741634 (PMC8761734; doi:10.3389/fimmu.2021.741634)
Supplement: Supplementary file 4 [file Table_4.xlsx]

## Sheet: Sheet1
Supplemental Table S4
A list of GPCRs that have a significant positive correlation with macrophages.
Gene	cor	p.value
HTR1B	0.338735	1.95209e-13
HTR2A	0.540276	3.66698e-35
HTR2B	0.376438	1.83577e-16
HTR7	0.554243	2.81231e-37
ADORA1	0.45255	6.67149e-24
ADORA2A	0.298662	1.21741e-10
MC2R	0.180908	0.00012225
ADRA1A	0.205346	1.23604e-05
ADRA1B	0.18777	6.61091e-05
ADRA1D	0.164467	0.000487822
ADRA2A	0.235739	4.7619e-07
APLNR	0.317336	6.83571e-12
BDKRB1	0.366963	1.15505e-15
BDKRB2	0.323877	2.37426e-12
ADRB1	0.257767	3.35144e-08
ADRB2	0.492638	1.20479e-28
ADRB3	0.376078	1.9712e-16
OPN1SW	0.235365	4.97021e-07
C3AR1	0.657904	1.20663e-56
C5AR1	0.56442	6.9805e-39
CALCRL	0.571113	5.72178e-40
CNR1	0.471314	4.80739e-26
CNR2	0.459125	1.22628e-24
CCR1	0.732723	3.12933e-76
CCR10	0.407217	3.03705e-19
CCR2	0.703288	8.59634e-68
CCR3	0.429083	2.10459e-21
CCR4	0.589585	4.22858e-43
CCR5	0.679862	8.71047e-62
CCR6	0.242044	2.2857e-07
CCR7	0.57559	1.03946e-40
CCR8	0.561678	1.91354e-38
CCR9	0.160172	0.00068608
CMKLR1	0.775018	1.54147e-90
XCR1	0.499449	1.6257e-29
CCKAR	0.286494	7.13543e-10
CRHR1	0.193928	3.73623e-05
CX3CR1	0.454369	4.19116e-24
CXCR3	0.250988	7.7916e-08
CXCR5	0.452631	6.53542e-24
CXCR6	0.535557	1.80632e-34
CYSLTR1	0.643613	1.59254e-53
CYSLTR2	0.644453	1.05506e-53
DRD5	0.160581	0.000664415
EDNRA	0.36912	7.63978e-16
EDNRB	0.317688	6.4613e-12
CASR	0.252553	6.42663e-08
FPR1	0.752321	1.68445e-82
FFAR1	0.206653	1.08463e-05
FFAR2	0.455306	3.29474e-24
FFAR3	0.427525	3.03608e-21
FZD1	0.602159	2.38094e-45
FZD10	0.19438	3.58012e-05
FZD2	0.491903	1.49173e-28
FZD4	0.469177	8.56193e-26
FZD7	0.19776	2.59554e-05
FZD8	0.303606	5.7931e-11
GALR1	0.231405	7.79282e-07
GALR2	0.194762	3.45325e-05
GLP1R	0.168489	0.000351733
GLP2R	0.21475	4.73916e-06
GPBAR1	0.434507	5.79144e-22
GPR12	0.130779	0.00567453
GPR15	0.253353	5.82114e-08
GPR161	0.400719	1.24191e-18
GPR182	0.430593	1.47304e-21
GPR183	0.580881	1.33804e-41
GPR4	0.451551	8.60258e-24
GPR84	0.726408	2.50482e-74
GPR87	0.128959	0.00638724
GPRC5B	0.498144	2.39413e-29
HRH1	0.224338	1.70499e-06
HRH2	0.731505	7.35888e-76
HRH4	0.34599	5.48333e-14
KISS1R	0.124579	0.00844267
LPAR1	0.44811	2.05146e-23
LPAR4	0.473748	2.47794e-26
MAS1	0.184969	8.51921e-05
MRGPRE	0.287745	5.97179e-10
MRGPRF	0.59014	3.38015e-43
MRGPRX2	0.156641	0.000902508
MAS1L	0.304806	4.8268e-11
MCHR1	0.510779	5.24622e-31
MCHR2	0.169948	0.000311839
MC4R	0.243879	1.83903e-07
MC5R	0.207174	1.02932e-05
OPN4	0.229694	9.44204e-07
MTNR1A	0.193382	3.93274e-05
GRM1	0.126326	0.00756096
GRM2	0.318045	6.10291e-12
GRM5	0.176062	0.00018623
GRM6	0.160528	0.000667154
CHRM2	0.313763	1.2048e-11
CHRM4	0.357842	6.41119e-15
CHRM5	0.15601	0.000947244
GPR18	0.419305	2.03361e-20
NMUR1	0.313071	1.34356e-11
NMUR2	0.14245	0.00256724
NPFFR2	0.266371	1.10888e-08
NPY1R	0.219715	2.80717e-06
NPY2R	0.336029	3.10826e-13
NPY5R	0.196517	2.92318e-05
NTSR1	0.155054	0.00101898
FPR2	0.692923	4.59757e-65
FPR3	0.553559	3.58985e-37
OPRL1	0.670072	1.93657e-59
OR10G2	0.129155	0.00630685
OR1E1	0.130436	0.00580314
OR2B11	0.135214	0.0042273
OR2C3	0.145256	0.00210271
OR2L13	0.233671	6.03088e-07
OR3A2	0.176887	0.000173486
OR4C6	0.124943	0.00825171
OR51E1	0.210323	7.48232e-06
OR51E2	0.303541	5.84968e-11
OR52N4	0.227063	1.26456e-06
OR7C1	0.162254	0.000582156
OR8G5	0.166402	0.000417183
OPN3	0.215889	4.20751e-06
GPR68	0.664051	4.85659e-58
P2RY1	0.189414	5.68664e-05
P2RY12	0.533011	4.22646e-34
P2RY13	0.68342	1.15966e-62
P2RY14	0.584475	3.25449e-42
P2RY6	0.656931	1.99251e-56
P2RY8	0.626724	4.80569e-50
PTH1R	0.422315	1.0198e-20
ADCYAP1R1	0.490996	1.94012e-28
PTAFR	0.680875	4.91926e-62
GPR1	0.600321	5.14987e-45
GPR132	0.528684	1.76246e-33
GPR141	0.69358	3.11321e-65
GPR142	0.272561	4.88253e-09
GPR146	0.28081	1.58399e-09
GPR158	0.165473	0.000449825
GPR162	0.549464	1.52763e-36
GPR171	0.55163	7.11936e-37
GPR173	0.33766	2.34978e-13
GPR174	0.529033	1.57211e-33
GPR176	0.650321	5.73407e-55
GPR20	0.154627	0.00105254
GPR25	0.298799	1.19273e-10
GPR27	0.569024	1.2566e-39
GPR31	0.344434	7.2202e-14
GPR33	0.169411	0.000325997
GPR34	0.665634	2.09691e-58
GPR37	0.181607	0.00011495
GPR55	0.322188	3.12737e-12
GPR63	0.203185	1.53118e-05
GPR82	0.429694	1.82225e-21
GPR85	0.582559	6.93093e-42
GPR88	0.481183	3.16813e-27
PROKR1	0.196633	2.89122e-05
PTGIR	0.610043	8.21574e-47
PTGDR	0.394282	4.86325e-18
PTGER1	0.263347	1.64318e-08
PTGER2	0.481515	2.88634e-27
PTGER3	0.528271	2.01791e-33
PTGFR	0.583065	5.67878e-42
F2RL2	0.196753	2.85818e-05
F2RL3	0.456294	2.55391e-24
GPR65	0.720407	1.44067e-72
NPY6R	0.203158	1.53532e-05
OR14L1P	0.253704	5.57317e-08
OR2I1P	0.261843	1.99437e-08
P2RY10	0.655408	4.35475e-56
RXFP3	0.19029	5.24553e-05
RXFP1	0.396262	3.20622e-18
SMO	0.263889	1.53189e-08
SSTR2	0.496614	3.76267e-29
SSTR3	0.452863	6.15971e-24
S1PR1	0.559819	3.77177e-38
S1PR2	0.586332	1.55676e-42
S1PR3	0.513569	2.2075e-31
S1PR4	0.595171	4.35604e-44
S1PR5	0.317002	7.20932e-12
TACR2	0.230884	8.26296e-07
TACR1	0.402071	9.28824e-19
SUCNR1	0.672968	4.00054e-60
TBXA2R	0.533986	3.0551e-34
TSHR	0.387789	1.87036e-17
TAAR1	0.161385	0.000623634
AGTR1	0.466618	1.70031e-25
AGTR2	0.186395	7.49106e-05
GPR17	0.149013	0.00160075
UTS2R	0.163205	0.0005397
VIPR2	0.40252	8.43122e-19
AVPR1A	0.559242	4.65015e-38
AVPR1B	0.165598	0.00044528
AVPR2	0.32049	4.11829e-12
