# Supplementary material for: Multi-Omics Analysis for Transcriptional Regulation of Immune-Related Targets Using Epigenetic Data: A New Research Direction
Source: Front Immunol. 2022 Jan 3;12:741634. doi: 10.3389/fimmu.2021.741634 (PMC8761734; doi:10.3389/fimmu.2021.741634)
Supplement: Supplementary file 5 [file Table_5.xlsx]

## Sheet: Sheet1
Supplemental Table S5
A list of TFs that significantly correlated with the open chromatin regions in GPRC5B promoter.
Open chromatin regigons of GPRC5B promoter	TF name	ABS(cor)	pvalue
chr16:19884686-19885185	GATA4	0.616	6.33648e-05
chr16:19884686-19885185	HOXC9	0.504	0.00170365
chr16:19886177-19886676	ASCL1	0.497	0.00205487
chr16:19884686-19885185	SMAD4	0.493	0.00223483
chr16:19884686-19885185	E2F7	0.474	0.00349268
chr16:19884686-19885185	SAP30	0.454	0.00542584
chr16:19886177-19886676	TP63	0.421	0.0105704
chr16:19886177-19886676	TFAP2C	0.41	0.0130302
chr16:19884686-19885185	POLR3G	0.407	0.0136373
chr16:19884686-19885185	CDK9	0.404	0.0146117
chr16:19884686-19885185	CHD2	0.403	0.0147013
chr16:19884686-19885185	FOXP1	0.379	0.0227007
chr16:19884686-19885185	SMAD2	0.369	0.026801
chr16:19886177-19886676	MEF2B	0.358	0.0318969
chr16:19886177-19886676	RBL2	0.356	0.0330236
chr16:19886177-19886676	ESRRA	0.354	0.0340271
chr16:19884686-19885185	HEY1	0.352	0.0350848
chr16:19886177-19886676	RBPJ	0.349	0.036789
chr16:19884686-19885185	ELL2	0.347	0.0379619
chr16:19886177-19886676	CREBBP	0.345	0.039266
chr16:19884686-19885185	IRF3	0.341	0.0418474
chr16:19886177-19886676	PPARG	0.336	0.044825
chr16:19886177-19886676	TAT	0.33	0.0492
chr16:19886177-19886676	SALL4	0.329	0.0499088
chr16:19886177-19886676	ARNTL	0.327	0.0519215
chr16:19886177-19886676	SFMBT1	0.327	0.0515143
chr16:19884686-19885185	SRC	0.325	0.052885
chr16:19886177-19886676	POLR3A	0.325	0.0530095
chr16:19886177-19886676	ESR1	0.32	0.057436
chr16:19886177-19886676	GATAD1	0.32	0.0570085
chr16:19886177-19886676	KLF11	0.32	0.0570716
chr16:19884686-19885185	HOXC11	0.315	0.0615073
chr16:19884686-19885185	E2F4	0.31	0.0655075
chr16:19884686-19885185	EP400	0.304	0.0717853
chr16:19886177-19886676	CDK9	0.304	0.0716058
chr16:19886177-19886676	AR	0.301	0.0742921
chr16:19886177-19886676	UBTF	0.301	0.0748783
chr16:19884686-19885185	ATF1	0.299	0.076668
chr16:19886177-19886676	MEIS1	0.298	0.0776152
chr16:19884686-19885185	CUX1	0.297	0.0780842
chr16:19886177-19886676	IRF5	0.296	0.079451
chr16:19886177-19886676	BRF1	0.285	0.0918289
chr16:19884686-19885185	CREBBP	0.284	0.0933184
chr16:19886177-19886676	EED	0.282	0.0951586
chr16:19886177-19886676	RFX2	0.282	0.0954604
chr16:19884686-19885185	CDK2	0.281	0.0969173
chr16:19884686-19885185	ETV1	0.28	0.098517
chr16:19886177-19886676	CHD2	0.278	0.100452
chr16:19886177-19886676	TBP	0.278	0.101213
chr16:19884686-19885185	RARG	0.275	0.10482
chr16:19884686-19885185	SALL4	0.275	0.104344
chr16:19884686-19885185	AR	0.273	0.10776
chr16:19886177-19886676	E2F7	0.273	0.106704
chr16:19886177-19886676	THAP11	0.273	0.106986
chr16:19884686-19885185	KDM5A	0.272	0.108678
chr16:19886177-19886676	BMI1	0.272	0.109196
chr16:19886177-19886676	IRF3	0.272	0.108724
chr16:19886177-19886676	RAG1	0.272	0.108671
chr16:19886177-19886676	EGR2	0.27	0.111117
chr16:19886177-19886676	SREBF2	0.266	0.11655
chr16:19886177-19886676	OGT	0.263	0.121569
chr16:19884686-19885185	MBD2	0.262	0.122752
chr16:19884686-19885185	NCAPG	0.262	0.123232
chr16:19884686-19885185	VEZF1	0.262	0.122502
chr16:19884686-19885185	STAT3	0.261	0.124481
chr16:19886177-19886676	CBFB	0.261	0.124698
chr16:19886177-19886676	EP400	0.261	0.123534
chr16:19886177-19886676	IRF4	0.261	0.123872
chr16:19884686-19885185	PBX3	0.258	0.129011
chr16:19884686-19885185	FOXO3	0.256	0.132341
chr16:19884686-19885185	FOSL1	0.249	0.142639
chr16:19884686-19885185	THAP11	0.247	0.146134
chr16:19886177-19886676	MAZ	0.247	0.14628
chr16:19886177-19886676	TCF7L1	0.247	0.1471
chr16:19886177-19886676	ARID3A	0.245	0.149346
chr16:19886177-19886676	LYL1	0.245	0.14966
chr16:19886177-19886676	RARA	0.245	0.150654
chr16:19884686-19885185	BRF1	0.244	0.151049
chr16:19886177-19886676	GATA2	0.243	0.153107
chr16:19886177-19886676	BRD2	0.242	0.154942
chr16:19886177-19886676	FOXP2	0.242	0.155039
chr16:19886177-19886676	CBX7	0.241	0.157014
chr16:19884686-19885185	RFX5	0.239	0.160184
chr16:19884686-19885185	E2F3	0.238	0.161843
chr16:19886177-19886676	SPIB	0.238	0.161585
chr16:19886177-19886676	NR2F1	0.237	0.163105
chr16:19884686-19885185	KDM3A	0.236	0.166492
chr16:19886177-19886676	TERF2	0.236	0.165677
chr16:19884686-19885185	EGR1	0.235	0.167417
chr16:19886177-19886676	PAX6	0.234	0.168977
chr16:19886177-19886676	MEF2A	0.233	0.172206
chr16:19884686-19885185	NIPBL	0.231	0.175764
chr16:19884686-19885185	YY1	0.23	0.17755
chr16:19886177-19886676	KDM4C	0.23	0.177168
chr16:19884686-19885185	LHX2	0.229	0.18001
chr16:19884686-19885185	IRF4	0.228	0.181943
chr16:19884686-19885185	RBL2	0.228	0.180529
chr16:19886177-19886676	BACH2	0.226	0.184123
chr16:19886177-19886676	E2F4	0.226	0.185393
chr16:19884686-19885185	TBP	0.225	0.186118
chr16:19886177-19886676	CUX1	0.224	0.188645
chr16:19886177-19886676	NIPBL	0.224	0.188268
chr16:19886177-19886676	PBX3	0.224	0.189059
chr16:19884686-19885185	KAT2B	0.221	0.196221
chr16:19886177-19886676	MYC	0.221	0.195846
chr16:19886177-19886676	NR4A1	0.221	0.194759
chr16:19886177-19886676	RING1	0.221	0.194239
chr16:19884686-19885185	YAP1	0.22	0.196334
chr16:19886177-19886676	BCL6	0.22	0.196658
chr16:19886177-19886676	IKZF1	0.22	0.197596
chr16:19886177-19886676	MAX	0.22	0.197362
chr16:19884686-19885185	TAT	0.218	0.201005
chr16:19884686-19885185	SREBF2	0.218	0.201921
chr16:19886177-19886676	TCF12	0.218	0.200706
chr16:19886177-19886676	SNAPC2	0.215	0.208556
chr16:19886177-19886676	HEY1	0.214	0.209954
chr16:19886177-19886676	TAL1	0.214	0.209069
chr16:19884686-19885185	HOXA9	0.213	0.2123
chr16:19886177-19886676	HDAC3	0.213	0.21203
chr16:19886177-19886676	SIX5	0.213	0.212901
chr16:19886177-19886676	SMAD3	0.213	0.212139
chr16:19884686-19885185	ELF1	0.212	0.214194
chr16:19884686-19885185	EPO	0.212	0.214569
chr16:19886177-19886676	POLR3D	0.212	0.21558
chr16:19884686-19885185	GATA6	0.211	0.215766
chr16:19884686-19885185	CDK8	0.209	0.220448
chr16:19886177-19886676	EPO	0.209	0.221036
chr16:19886177-19886676	HOXB7	0.209	0.222144
chr16:19886177-19886676	WWTR1	0.209	0.220501
chr16:19884686-19885185	RAG1	0.208	0.224563
chr16:19886177-19886676	GATA4	0.208	0.22385
chr16:19886177-19886676	JUNB	0.208	0.223205
chr16:19886177-19886676	PAX5	0.208	0.222619
chr16:19886177-19886676	ERG	0.206	0.227637
chr16:19884686-19885185	JMJD6	0.204	0.232235
chr16:19884686-19885185	SMARCB1	0.204	0.233278
chr16:19886177-19886676	ETS1	0.204	0.233773
chr16:19886177-19886676	FLI1	0.204	0.232552
chr16:19886177-19886676	E2F6	0.203	0.234655
chr16:19886177-19886676	NR2F2	0.203	0.235916
chr16:19884686-19885185	CBX3	0.201	0.239775
chr16:19884686-19885185	MEF2B	0.201	0.239872
chr16:19884686-19885185	IRF5	0.2	0.241772
chr16:19886177-19886676	BATF	0.2	0.241486
chr16:19884686-19885185	GATAD1	0.199	0.243693
chr16:19884686-19885185	CBX8	0.199	0.243423
chr16:19886177-19886676	CDX2	0.199	0.244057
chr16:19886177-19886676	MYH11	0.199	0.243547
chr16:19886177-19886676	ASH2L	0.198	0.247183
chr16:19884686-19885185	TFAP2C	0.197	0.249949
chr16:19886177-19886676	FOSL1	0.196	0.25148
chr16:19886177-19886676	EZH1	0.195	0.253762
chr16:19886177-19886676	SPDEF	0.195	0.255041
chr16:19884686-19885185	POLR3A	0.193	0.259859
chr16:19886177-19886676	FOXO3	0.192	0.260891
chr16:19886177-19886676	VDR	0.192	0.262231
chr16:19884686-19885185	EGR2	0.19	0.266942
chr16:19884686-19885185	GRHL2	0.19	0.266765
chr16:19886177-19886676	KDM1A	0.19	0.266545
chr16:19884686-19885185	RCOR1	0.189	0.26931
chr16:19884686-19885185	HIF1A	0.188	0.271684
chr16:19886177-19886676	CBX3	0.188	0.271345
chr16:19884686-19885185	KDM4C	0.187	0.276059
chr16:19884686-19885185	ERCC6	0.186	0.278211
chr16:19886177-19886676	MYB	0.184	0.283822
chr16:19884686-19885185	NR2F1	0.183	0.284267
chr16:19884686-19885185	SSRP1	0.183	0.28654
chr16:19886177-19886676	GRHL2	0.183	0.285172
chr16:19884686-19885185	JARID2	0.182	0.287414
chr16:19884686-19885185	MYBL2	0.182	0.287733
chr16:19884686-19885185	MYH11	0.182	0.288179
chr16:19884686-19885185	SF1	0.182	0.288315
chr16:19886177-19886676	MXI1	0.182	0.287162
chr16:19886177-19886676	FOSL2	0.181	0.289822
chr16:19886177-19886676	SUMO1	0.181	0.290143
chr16:19884686-19885185	ADNP	0.18	0.292701
chr16:19884686-19885185	FOXK1	0.18	0.293964
chr16:19886177-19886676	CDK2	0.179	0.296821
chr16:19884686-19885185	JUN	0.178	0.299757
chr16:19884686-19885185	FOXA2	0.177	0.302753
chr16:19884686-19885185	HNF1B	0.177	0.300475
chr16:19884686-19885185	BATF	0.176	0.304333
chr16:19886177-19886676	NCAPG	0.176	0.305747
chr16:19884686-19885185	KDM5C	0.175	0.307107
chr16:19886177-19886676	STAT2	0.175	0.306217
chr16:19886177-19886676	SIN3A	0.174	0.310183
chr16:19884686-19885185	BRD2	0.173	0.311756
chr16:19884686-19885185	OGT	0.173	0.313655
chr16:19884686-19885185	SCML2	0.173	0.313383
chr16:19886177-19886676	BRF2	0.173	0.311725
chr16:19886177-19886676	RUNX1T1	0.173	0.312846
chr16:19884686-19885185	BMI1	0.172	0.315758
chr16:19886177-19886676	BCL3	0.172	0.316118
chr16:19884686-19885185	CHD8	0.171	0.31856
chr16:19884686-19885185	EMX1	0.171	0.319301
chr16:19886177-19886676	TAF1	0.171	0.317387
chr16:19884686-19885185	HNF4A	0.17	0.32279
chr16:19884686-19885185	USF1	0.17	0.322787
chr16:19886177-19886676	CHD8	0.17	0.320731
chr16:19886177-19886676	CIITA	0.17	0.321231
chr16:19886177-19886676	NOTCH1	0.17	0.32204
chr16:19884686-19885185	PBX1	0.169	0.324803
chr16:19884686-19885185	PPARD	0.169	0.323473
chr16:19886177-19886676	RCOR1	0.169	0.324492
chr16:19884686-19885185	UBTF	0.168	0.328248
chr16:19886177-19886676	ELF1	0.168	0.32733
chr16:19886177-19886676	TCF21	0.167	0.329765
chr16:19886177-19886676	GATA6	0.166	0.332618
chr16:19886177-19886676	YY1	0.166	0.33257
chr16:19884686-19885185	HNF4G	0.165	0.336532
chr16:19886177-19886676	NFIC	0.165	0.334877
chr16:19886177-19886676	CHD1	0.164	0.338156
chr16:19886177-19886676	NCOR2	0.164	0.339381
chr16:19884686-19885185	CBX5	0.163	0.343062
chr16:19884686-19885185	GREB1	0.162	0.344822
chr16:19886177-19886676	ATF3	0.162	0.343943
chr16:19886177-19886676	CEBPA	0.162	0.344373
chr16:19886177-19886676	KDM5A	0.161	0.346809
chr16:19884686-19885185	RARA	0.16	0.349916
chr16:19884686-19885185	STAT6	0.158	0.357409
chr16:19884686-19885185	ESR1	0.157	0.361291
chr16:19884686-19885185	HSF2	0.157	0.361934
chr16:19884686-19885185	PAX6	0.157	0.361529
chr16:19886177-19886676	NRF1	0.157	0.361172
chr16:19884686-19885185	SRF	0.156	0.364713
chr16:19884686-19885185	BCL6	0.156	0.364144
chr16:19886177-19886676	STAT3	0.153	0.373626
chr16:19884686-19885185	HDAC6	0.152	0.374858
chr16:19884686-19885185	KDM5B	0.152	0.376796
chr16:19884686-19885185	ELF5	0.151	0.379297
chr16:19884686-19885185	KDM6B	0.151	0.377784
chr16:19884686-19885185	STAT1	0.151	0.377843
chr16:19884686-19885185	TP63	0.15	0.382352
chr16:19884686-19885185	NR2F2	0.15	0.381942
chr16:19886177-19886676	RYBP	0.15	0.382676
chr16:19884686-19885185	ATF2	0.149	0.385574
chr16:19884686-19885185	CIITA	0.148	0.39062
chr16:19884686-19885185	HSF1	0.148	0.389577
chr16:19884686-19885185	SNAPC4	0.148	0.387954
chr16:19884686-19885185	MITF	0.146	0.396735
chr16:19886177-19886676	ATF2	0.146	0.395369
chr16:19886177-19886676	SRC	0.146	0.395054
chr16:19886177-19886676	HCFC1	0.145	0.398496
chr16:19886177-19886676	STAT1	0.145	0.399222
chr16:19886177-19886676	TP73	0.145	0.398223
chr16:19884686-19885185	EOMES	0.143	0.406714
chr16:19884686-19885185	FOSL2	0.143	0.406834
chr16:19884686-19885185	GTF2B	0.143	0.405947
chr16:19884686-19885185	BRD3	0.142	0.409942
chr16:19884686-19885185	SETDB1	0.142	0.409918
chr16:19884686-19885185	SMARCA4	0.142	0.409467
chr16:19884686-19885185	NR5A2	0.142	0.40708
chr16:19886177-19886676	NANOG	0.142	0.407356
chr16:19884686-19885185	EHMT2	0.141	0.412684
chr16:19884686-19885185	KDM1A	0.141	0.413256
chr16:19884686-19885185	POLR2B	0.14	0.415692
chr16:19886177-19886676	KAT5	0.139	0.418994
chr16:19886177-19886676	LMO2	0.139	0.418165
chr16:19886177-19886676	TFAP2A	0.139	0.418903
chr16:19884686-19885185	FOXP2	0.138	0.422298
chr16:19884686-19885185	NFE2	0.138	0.421282
chr16:19886177-19886676	CDK8	0.138	0.423033
chr16:19884686-19885185	BACH1	0.137	0.424413
chr16:19884686-19885185	ASCL1	0.136	0.429104
chr16:19884686-19885185	NRF1	0.135	0.431013
chr16:19884686-19885185	MAFF	0.135	0.433961
chr16:19886177-19886676	DYRK1A	0.135	0.431838
chr16:19886177-19886676	EBF1	0.135	0.434069
chr16:19884686-19885185	SMC3	0.134	0.436176
chr16:19886177-19886676	ATF4	0.133	0.440817
chr16:19886177-19886676	CBX5	0.133	0.438235
chr16:19886177-19886676	JUN	0.133	0.441057
chr16:19884686-19885185	CHD7	0.132	0.442629
chr16:19884686-19885185	CDK7	0.131	0.444774
chr16:19884686-19885185	EPAS1	0.131	0.445356
chr16:19886177-19886676	SF1	0.131	0.447884
chr16:19884686-19885185	MAFK	0.129	0.452465
chr16:19884686-19885185	NFYA	0.129	0.454704
chr16:19886177-19886676	RXRA	0.129	0.453449
chr16:19886177-19886676	SCML2	0.129	0.453098
chr16:19884686-19885185	JUNB	0.128	0.458669
chr16:19884686-19885185	PAX5	0.127	0.46087
chr16:19884686-19885185	TCF12	0.126	0.46531
chr16:19884686-19885185	IKZF1	0.124	0.469721
chr16:19884686-19885185	CEBPA	0.123	0.474401
chr16:19884686-19885185	KDM2B	0.123	0.473915
chr16:19884686-19885185	LMNB1	0.123	0.474423
chr16:19886177-19886676	STAT4	0.122	0.477795
chr16:19884686-19885185	CEBPB	0.121	0.482341
chr16:19884686-19885185	RING1	0.121	0.483846
chr16:19884686-19885185	SPIB	0.121	0.482331
chr16:19886177-19886676	MAF	0.121	0.480786
chr16:19884686-19885185	MED12	0.119	0.490155
chr16:19884686-19885185	RBP2	0.119	0.489118
chr16:19886177-19886676	GTF2B	0.119	0.489481
chr16:19884686-19885185	BCL11A	0.118	0.494278
chr16:19886177-19886676	DNMT1	0.118	0.492456
chr16:19886177-19886676	YAP1	0.118	0.494386
chr16:19884686-19885185	SOX9	0.116	0.499795
chr16:19886177-19886676	RBBP5	0.115	0.503442
chr16:19886177-19886676	SAP30	0.115	0.504371
chr16:19884686-19885185	SMAD3	0.114	0.509557
chr16:19886177-19886676	BCL11A	0.114	0.509212
chr16:19886177-19886676	NFYA	0.114	0.509285
chr16:19886177-19886676	NR5A2	0.114	0.509668
chr16:19886177-19886676	STAT5B	0.114	0.506361
chr16:19886177-19886676	EHF	0.113	0.510388
chr16:19884686-19885185	CHD1	0.112	0.515506
chr16:19886177-19886676	TP53	0.112	0.516707
chr16:19884686-19885185	FOXA1	0.111	0.518518
chr16:19886177-19886676	HDAC1	0.111	0.518833
chr16:19886177-19886676	HNF1B	0.111	0.519476
chr16:19886177-19886676	JUND	0.111	0.520717
chr16:19884686-19885185	FOS	0.108	0.529503
chr16:19884686-19885185	RYBP	0.108	0.531963
chr16:19886177-19886676	DNMT3A	0.108	0.529128
chr16:19886177-19886676	FOS	0.108	0.5296
chr16:19886177-19886676	FOXK1	0.108	0.53048
chr16:19886177-19886676	KLF4	0.108	0.530627
chr16:19884686-19885185	CDX2	0.107	0.535482
chr16:19884686-19885185	ELK1	0.107	0.535846
chr16:19886177-19886676	HSF2	0.107	0.534653
chr16:19886177-19886676	SMARCB1	0.107	0.53431
chr16:19886177-19886676	ATF1	0.106	0.538105
chr16:19886177-19886676	SIRT6	0.105	0.543286
chr16:19886177-19886676	USF1	0.105	0.541017
chr16:19884686-19885185	BACH2	0.104	0.544222
chr16:19884686-19885185	DNMT3A	0.104	0.544224
chr16:19884686-19885185	POU5F1	0.104	0.544514
chr16:19886177-19886676	PPARD	0.104	0.544338
chr16:19886177-19886676	RBP2	0.104	0.545275
chr16:19884686-19885185	GATA3	0.103	0.550581
chr16:19884686-19885185	AFF4	0.103	0.550739
chr16:19886177-19886676	POLR2B	0.103	0.550139
chr16:19884686-19885185	RBPJ	0.102	0.552627
chr16:19886177-19886676	ELK1	0.102	0.553218
chr16:19886177-19886676	FOXO1	0.102	0.552585
chr16:19886177-19886676	NR3C1	0.102	0.552343
chr16:19886177-19886676	SMAD4	0.102	0.552743
chr16:19886177-19886676	MAFK	0.101	0.55636
chr16:19884686-19885185	PIAS1	0.1	0.562798
chr16:19884686-19885185	GTF2I	0.099	0.56649
chr16:19886177-19886676	HIF1A	0.099	0.565674
chr16:19886177-19886676	SNAI2	0.099	0.566998
chr16:19884686-19885185	EED	0.098	0.569469
chr16:19884686-19885185	ZBTB17	0.097	0.574885
chr16:19886177-19886676	ELK4	0.097	0.572096
chr16:19886177-19886676	KAT2B	0.097	0.573487
chr16:19884686-19885185	SIX5	0.096	0.579348
chr16:19886177-19886676	SOX17	0.095	0.580873
chr16:19884686-19885185	RUNX1	0.094	0.583923
chr16:19886177-19886676	GATA3	0.094	0.585343
chr16:19886177-19886676	SNAPC4	0.094	0.583722
chr16:19884686-19885185	PML	0.093	0.587613
chr16:19884686-19885185	SFPQ	0.093	0.588116
chr16:19884686-19885185	WDR5	0.093	0.589471
chr16:19884686-19885185	MAX	0.093	0.590389
chr16:19886177-19886676	MEF2C	0.093	0.591364
chr16:19886177-19886676	NFATC1	0.093	0.590355
chr16:19884686-19885185	MYC	0.092	0.594612
chr16:19884686-19885185	PDX1	0.092	0.592691
chr16:19886177-19886676	KDM3A	0.092	0.595373
chr16:19886177-19886676	MED12	0.092	0.592507
chr16:19884686-19885185	HOXB13	0.091	0.598943
chr16:19884686-19885185	SUMO2	0.09	0.60013
chr16:19884686-19885185	TP73	0.09	0.602393
chr16:19886177-19886676	BHLHE40	0.09	0.602978
chr16:19884686-19885185	BRCA1	0.089	0.606905
chr16:19886177-19886676	NFYB	0.089	0.606475
chr16:19886177-19886676	NR2C2	0.089	0.605452
chr16:19884686-19885185	TCF7	0.088	0.608736
chr16:19886177-19886676	EOMES	0.088	0.609345
chr16:19886177-19886676	KDM5B	0.088	0.607911
chr16:19884686-19885185	SOX17	0.087	0.611973
chr16:19886177-19886676	PIAS1	0.087	0.612597
chr16:19886177-19886676	SOX2	0.087	0.613506
chr16:19884686-19885185	ARNTL	0.086	0.617049
chr16:19884686-19885185	SUMO1	0.086	0.616631
chr16:19886177-19886676	HOXC11	0.086	0.618363
chr16:19886177-19886676	SMAD2	0.086	0.619528
chr16:19886177-19886676	TCF7	0.086	0.61707
chr16:19884686-19885185	SIRT6	0.085	0.621919
chr16:19886177-19886676	MAFF	0.085	0.621792
chr16:19884686-19885185	E2F6	0.084	0.624679
chr16:19884686-19885185	FOXM1	0.084	0.624916
chr16:19886177-19886676	KDM6B	0.084	0.625816
chr16:19884686-19885185	JUND	0.083	0.629862
chr16:19884686-19885185	MEF2A	0.083	0.631064
chr16:19884686-19885185	ARID3A	0.082	0.63424
chr16:19884686-19885185	GTF2F1	0.082	0.63585
chr16:19886177-19886676	FOXM1	0.082	0.63619
chr16:19886177-19886676	IRF1	0.082	0.632729
chr16:19886177-19886676	RFX5	0.082	0.635454
chr16:19884686-19885185	MAF	0.081	0.637835
chr16:19886177-19886676	ELF5	0.081	0.638967
chr16:19886177-19886676	LMNB1	0.081	0.638553
chr16:19886177-19886676	HOXA9	0.08	0.6433
chr16:19884686-19885185	IRF1	0.079	0.64579
chr16:19886177-19886676	ELL2	0.079	0.648329
chr16:19886177-19886676	LIN9	0.079	0.649005
chr16:19884686-19885185	CENPA	0.078	0.650097
chr16:19884686-19885185	SNAI2	0.078	0.653052
chr16:19886177-19886676	RB1	0.078	0.650005
chr16:19884686-19885185	TRIM28	0.077	0.656532
chr16:19884686-19885185	BRF2	0.076	0.65883
chr16:19884686-19885185	ARNT	0.076	0.659812
chr16:19886177-19886676	HOXC9	0.076	0.660296
chr16:19884686-19885185	RFX2	0.075	0.661656
chr16:19884686-19885185	NR2C2	0.075	0.662431
chr16:19886177-19886676	FOXA2	0.075	0.663685
chr16:19886177-19886676	SETDB1	0.075	0.66507
chr16:19884686-19885185	NR4A1	0.074	0.667052
chr16:19884686-19885185	PHF8	0.074	0.667247
chr16:19884686-19885185	TAF1	0.074	0.666251
chr16:19884686-19885185	TCF7L1	0.074	0.667333
chr16:19886177-19886676	TEAD1	0.074	0.668685
chr16:19884686-19885185	SPDEF	0.073	0.670661
chr16:19884686-19885185	SMAD1	0.073	0.674222
chr16:19886177-19886676	CTNNB1	0.073	0.670644
chr16:19886177-19886676	RXRG	0.073	0.673066
chr16:19884686-19885185	BRD4	0.072	0.678309
chr16:19886177-19886676	HDAC6	0.072	0.674536
chr16:19886177-19886676	MITF	0.071	0.680483
chr16:19884686-19885185	GATA2	0.07	0.684856
chr16:19884686-19885185	HDAC3	0.07	0.686553
chr16:19884686-19885185	RBBP5	0.07	0.683622
chr16:19886177-19886676	ARNT	0.07	0.685013
chr16:19886177-19886676	CEBPB	0.07	0.685638
chr16:19886177-19886676	SMARCA4	0.07	0.685266
chr16:19886177-19886676	CENPA	0.069	0.688294
chr16:19886177-19886676	SUMO2	0.069	0.691013
chr16:19886177-19886676	PDX1	0.068	0.694391
chr16:19886177-19886676	PRKDC	0.068	0.693235
chr16:19886177-19886676	TCF7L2	0.067	0.698752
chr16:19884686-19885185	LMNA	0.066	0.703201
chr16:19884686-19885185	RB1	0.066	0.701522
chr16:19886177-19886676	PBX1	0.066	0.70418
chr16:19886177-19886676	TBL1XR1	0.066	0.703833
chr16:19886177-19886676	ERCC6	0.065	0.707433
chr16:19886177-19886676	GREB1	0.065	0.707586
chr16:19886177-19886676	HDAC2	0.065	0.706621
chr16:19884686-19885185	CBX2	0.064	0.712615
chr16:19886177-19886676	EZH2	0.064	0.709938
chr16:19884686-19885185	EZH1	0.063	0.714514
chr16:19884686-19885185	DNMT1	0.063	0.712952
chr16:19884686-19885185	TBL1XR1	0.063	0.714886
chr16:19886177-19886676	E2F1	0.063	0.713044
chr16:19886177-19886676	MECP2	0.063	0.715483
chr16:19886177-19886676	PRDM1	0.063	0.715269
chr16:19884686-19885185	TERF2	0.062	0.721273
chr16:19884686-19885185	KLF5	0.062	0.72154
chr16:19886177-19886676	CBX2	0.062	0.717684
chr16:19886177-19886676	RELA	0.062	0.720777
chr16:19886177-19886676	SFPQ	0.062	0.717557
chr16:19886177-19886676	CHD7	0.061	0.72524
chr16:19886177-19886676	FOXA1	0.061	0.725186
chr16:19884686-19885185	LYL1	0.06	0.728238
chr16:19886177-19886676	EHMT2	0.06	0.729819
chr16:19886177-19886676	GABPA	0.06	0.727535
chr16:19884686-19885185	SUPT5H	0.059	0.733827
chr16:19884686-19885185	TCF21	0.059	0.73057
chr16:19886177-19886676	NR1H2	0.059	0.730978
chr16:19884686-19885185	STAT5A	0.058	0.73824
chr16:19884686-19885185	LMO2	0.057	0.740937
chr16:19884686-19885185	MECP2	0.056	0.745831
chr16:19884686-19885185	SMARCC2	0.056	0.744877
chr16:19884686-19885185	EHF	0.056	0.747779
chr16:19884686-19885185	HOXB7	0.054	0.754922
chr16:19884686-19885185	GABPA	0.054	0.752445
chr16:19886177-19886676	HOXB13	0.054	0.754017
chr16:19886177-19886676	JMJD1C	0.054	0.753264
chr16:19884686-19885185	NFYB	0.053	0.756845
chr16:19884686-19885185	STAT2	0.052	0.765085
chr16:19884686-19885185	NFATC1	0.052	0.762042
chr16:19884686-19885185	RNF2	0.052	0.764094
chr16:19884686-19885185	DYRK1A	0.051	0.766702
chr16:19884686-19885185	NFIC	0.051	0.767938
chr16:19886177-19886676	RUNX1	0.051	0.765589
chr16:19886177-19886676	SUPT5H	0.051	0.769504
chr16:19884686-19885185	JMJD1C	0.05	0.771565
chr16:19886177-19886676	VEZF1	0.05	0.771328
chr16:19884686-19885185	USF2	0.049	0.777433
chr16:19886177-19886676	BRD1	0.049	0.776193
chr16:19886177-19886676	FOXP3	0.049	0.775094
chr16:19884686-19885185	ETS1	0.048	0.781548
chr16:19884686-19885185	POLR3D	0.048	0.779919
chr16:19884686-19885185	SREBF1	0.048	0.7826
chr16:19884686-19885185	LIN9	0.048	0.779003
chr16:19884686-19885185	SMC1A	0.047	0.787294
chr16:19886177-19886676	SP2	0.047	0.784076
chr16:19884686-19885185	BCL3	0.046	0.78895
chr16:19884686-19885185	TEAD1	0.046	0.790399
chr16:19886177-19886676	CBX8	0.046	0.791316
chr16:19884686-19885185	ESRRA	0.045	0.794426
chr16:19886177-19886676	EGR1	0.045	0.794838
chr16:19884686-19885185	FOXO1	0.044	0.799895
chr16:19884686-19885185	HDAC2	0.044	0.800126
chr16:19884686-19885185	PRKDC	0.043	0.803991
chr16:19884686-19885185	TET2	0.043	0.801635
chr16:19886177-19886676	SMARCC2	0.043	0.804206
chr16:19884686-19885185	ERG	0.042	0.807786
chr16:19884686-19885185	TERF1	0.042	0.809003
chr16:19886177-19886676	E2F3	0.042	0.806409
chr16:19886177-19886676	GTF2F1	0.042	0.807027
chr16:19886177-19886676	H2AFX	0.042	0.80776
chr16:19886177-19886676	KDM5C	0.042	0.806003
chr16:19886177-19886676	POLR3G	0.042	0.805687
chr16:19884686-19885185	SP2	0.041	0.812526
chr16:19884686-19885185	PAF1	0.04	0.817904
chr16:19886177-19886676	EPAS1	0.04	0.819082
chr16:19886177-19886676	PAF1	0.04	0.816246
chr16:19886177-19886676	TERF1	0.04	0.817285
chr16:19886177-19886676	BRD3	0.039	0.821496
chr16:19886177-19886676	HIRA	0.039	0.821599
chr16:19886177-19886676	RARG	0.038	0.826812
chr16:19884686-19885185	ATF3	0.037	0.830044
chr16:19884686-19885185	BHLHE40	0.037	0.831645
chr16:19884686-19885185	RXRA	0.037	0.828903
chr16:19886177-19886676	SMC1A	0.036	0.832885
chr16:19884686-19885185	MBD3	0.035	0.841016
chr16:19884686-19885185	HDAC1	0.035	0.83998
chr16:19886177-19886676	SMARCC1	0.035	0.840028
chr16:19886177-19886676	TET2	0.034	0.843066
chr16:19886177-19886676	KDM2B	0.033	0.849232
chr16:19886177-19886676	PAX3	0.033	0.846549
chr16:19884686-19885185	SOX4	0.032	0.854437
chr16:19886177-19886676	ETV1	0.032	0.852898
chr16:19884686-19885185	TP53	0.031	0.856577
chr16:19886177-19886676	POU2F1	0.031	0.857298
chr16:19884686-19885185	NR1H2	0.03	0.862666
chr16:19884686-19885185	SFMBT1	0.03	0.85994
chr16:19886177-19886676	BACH1	0.029	0.868512
chr16:19886177-19886676	BRD4	0.029	0.867323
chr16:19886177-19886676	SMAD1	0.029	0.864928
chr16:19886177-19886676	SMC3	0.029	0.866296
chr16:19886177-19886676	SSRP1	0.029	0.864768
chr16:19884686-19885185	XRN2	0.028	0.870267
chr16:19884686-19885185	WWTR1	0.028	0.873159
chr16:19886177-19886676	HSF1	0.028	0.872977
chr16:19886177-19886676	KLF5	0.028	0.872227
chr16:19886177-19886676	SREBF1	0.028	0.873136
chr16:19886177-19886676	ZBTB17	0.028	0.873463
chr16:19884686-19885185	BDP1	0.027	0.877666
chr16:19884686-19885185	PRDM1	0.027	0.877769
chr16:19884686-19885185	ASH2L	0.026	0.881164
chr16:19884686-19885185	TAL1	0.026	0.878629
chr16:19884686-19885185	E2F1	0.026	0.879584
chr16:19884686-19885185	POU2F1	0.026	0.881982
chr16:19886177-19886676	NFE2	0.026	0.881541
chr16:19886177-19886676	POU5F1	0.026	0.881188
chr16:19884686-19885185	VDR	0.025	0.883678
chr16:19886177-19886676	LMNA	0.025	0.884566
chr16:19886177-19886676	MBD3	0.025	0.88429
chr16:19884686-19885185	NR3C1	0.024	0.888863
chr16:19886177-19886676	AFF4	0.024	0.889949
chr16:19886177-19886676	RNF2	0.024	0.890906
chr16:19886177-19886676	GTF2I	0.023	0.893591
chr16:19886177-19886676	MYBL2	0.023	0.892401
chr16:19886177-19886676	PHF8	0.023	0.893707
chr16:19884686-19885185	TFAP2A	0.022	0.896878
chr16:19884686-19885185	FOXP3	0.022	0.897998
chr16:19884686-19885185	STAT5B	0.022	0.898397
chr16:19886177-19886676	STAT6	0.022	0.897855
chr16:19884686-19885185	CBFB	0.021	0.901191
chr16:19884686-19885185	KLF4	0.021	0.904644
chr16:19884686-19885185	RELA	0.021	0.903708
chr16:19884686-19885185	SMARCC1	0.021	0.904362
chr16:19884686-19885185	KAT5	0.021	0.901313
chr16:19884686-19885185	RXRG	0.021	0.90287
chr16:19886177-19886676	ATF7	0.021	0.903392
chr16:19886177-19886676	JARID2	0.021	0.904582
chr16:19886177-19886676	SOX9	0.021	0.903475
chr16:19886177-19886676	TTF2	0.021	0.902349
chr16:19884686-19885185	MYB	0.02	0.908738
chr16:19884686-19885185	TTF2	0.02	0.906719
chr16:19884686-19885185	EZH2	0.02	0.909349
chr16:19884686-19885185	TEAD4	0.02	0.90776
chr16:19886177-19886676	HNF4A	0.02	0.906902
chr16:19884686-19885185	ELK4	0.019	0.910591
chr16:19886177-19886676	CDK7	0.019	0.910726
chr16:19886177-19886676	FOXP1	0.019	0.91376
chr16:19886177-19886676	JMJD6	0.019	0.914488
chr16:19886177-19886676	SRF	0.018	0.918762
chr16:19884686-19885185	FLI1	0.017	0.922753
chr16:19884686-19885185	ATF4	0.017	0.922779
chr16:19884686-19885185	MAZ	0.017	0.919359
chr16:19884686-19885185	NANOG	0.016	0.925795
chr16:19886177-19886676	LEF1	0.016	0.924184
chr16:19884686-19885185	KLF11	0.015	0.929135
chr16:19886177-19886676	ADNP	0.015	0.930032
chr16:19886177-19886676	BRCA1	0.015	0.932178
chr16:19884686-19885185	MEIS1	0.014	0.937668
chr16:19884686-19885185	NCOR2	0.013	0.940666
chr16:19884686-19885185	H2AFX	0.013	0.939199
chr16:19884686-19885185	SNAPC2	0.013	0.939917
chr16:19886177-19886676	LHX2	0.013	0.940342
chr16:19884686-19885185	CTNNB1	0.012	0.94639
chr16:19884686-19885185	PPARG	0.012	0.943839
chr16:19886177-19886676	EMX1	0.012	0.944128
chr16:19886177-19886676	SOX4	0.012	0.945732
chr16:19884686-19885185	MXI1	0.011	0.948968
chr16:19886177-19886676	HNF4G	0.011	0.947332
chr16:19886177-19886676	WDR5	0.011	0.950515
chr16:19884686-19885185	BRD1	0.01	0.952867
chr16:19884686-19885185	PAX3	0.01	0.954639
chr16:19886177-19886676	STAT5A	0.01	0.955321
chr16:19886177-19886676	XRN2	0.01	0.952758
chr16:19884686-19885185	EBF1	0.009	0.95875
chr16:19884686-19885185	STAT4	0.009	0.959752
chr16:19886177-19886676	PML	0.008	0.96273
chr16:19886177-19886676	TEAD4	0.008	0.963312
chr16:19884686-19885185	MEF2C	0.007	0.965427
chr16:19884686-19885185	HIRA	0.006	0.973451
chr16:19884686-19885185	SIN3A	0.006	0.972607
chr16:19884686-19885185	HCFC1	0.005	0.978826
chr16:19884686-19885185	LEF1	0.005	0.976728
chr16:19884686-19885185	ATF7	0.005	0.976375
chr16:19886177-19886676	TRIM28	0.005	0.976537
chr16:19884686-19885185	CBX7	0.004	0.982985
chr16:19886177-19886676	USF2	0.004	0.981817
chr16:19884686-19885185	SOX2	0.003	0.98496
chr16:19884686-19885185	NOTCH1	0.003	0.986388
chr16:19886177-19886676	ZBTB33	0.003	0.98393
chr16:19884686-19885185	RUNX1T1	0.002	0.988691
chr16:19884686-19885185	TCF7L2	0.002	0.988578
chr16:19886177-19886676	BDP1	0.001	0.993239
chr16:19886177-19886676	MBD2	0.001	0.996401
chr16:19884686-19885185	ZBTB33	0	0.999411
